# Supplementary material for: The Effect of Vitamin K2 Supplementation on PIVKA-II Levels in Patients with Severe Motor and Intellectual Disabilities Undergoing Long-Term Tube Feeding
Source: MDPI journal article supplement (doi:10.3390/nu15214525), 2023-10-25
Supplement: s1 [file s1]

**Table S1.** List of abbreviations.

| Abbreviations | Contents                                                         |
|---------------|------------------------------------------------------------------|
| SMID          | Severe motor and intellectual disabilities                       |
| PIVKA-II      | Protein-induced vitamin K absence or antagonist II (prothrombin) |
| ucOC          | Undercarboxylated osteocalcin                                    |
| EM            | Erythromycin                                                     |
| CAM           | Clarithromycin                                                   |
| ST            | Trimethoprim–sulfamethoxazole                                    |
| PT            | Prothrombin time                                                 |
| PT-INR        | Prothrombin international ratio                                  |
| aPTT          | Activated partial thromboplastin time                            |
| AT-III        | Antithrombin III                                                 |
| HDL           | High-density lipoprotein                                         |
| LDL           | Low-density lipoprotein                                          |

**Table S2.** List of enteral formulas.

| Macro- and<br>Micro-<br>nutrients | Enteral Formulas          |                                      |                         |                         |                            | Trace Minerals                |                                   |
|-----------------------------------|---------------------------|--------------------------------------|-------------------------|-------------------------|----------------------------|-------------------------------|-----------------------------------|
|                                   | Elental P®<br>(/100 kcal) | Isocal 1.0<br>Junior®<br>(/100 kcal) | Climeal®<br>(/100 kcal) | Meiflow®<br>(/100 kcal) | MeiBalance®<br>(/100 kcal) | TESON®<br>(20 kcal/125<br>mL) | V CRESC CP10®<br>(80 kcal/125 mL) |
| Vitamin K (µg)                    | 4.49                      | 9.0                                  | 8.0                     | 6.3                     | 5.0                        | 0.0                           | 0.0                               |
| Vitamin A (µg)                    | 103.8                     | 63                                   | 80                      | 75                      | 60                         | 0.0                           | 0.0                               |
| Vitamin D (µg)                    | 2.7                       | 1.0                                  | 1.2                     | 0.63                    | 0.50                       | 0.0                           | 0.0                               |
| Vitamin E (mg)                    | 1.6                       | 0.9                                  | 1.4                     | 3.8                     | 3.0                        | 0.0                           | 0.0                               |
| Protein (g)                       | 3.3                       | 2.8                                  | 3.75                    | 4.0                     | 5.0                        | 0~13                          | 12.0                              |
| Fat (g)                           | 0.89                      | 3.3                                  | 3.35                    | 2.8                     | 2.5                        | 0.0                           | 0.0                               |
| Carbohydrate<br>(g)               | 19.9                      | 14.4                                 | 14.65                   | 15.9                    | 15.5                       | 4.5                           | 4.5                               |
| Copper (mg)                       | 0.11                      | 0.10                                 | 0.13                    | 0.13                    | 0.050                      | 0.3                           | -                                 |
| Zinc (mg)                         | 0.9                       | 3.0                                  | 6.0                     | 6.0                     | 6.0                        | 20                            | 50                                |
| Selenium (µg)                     | -                         | 1.0                                  | 1.5                     | 1.5                     | 1.0                        | 4.0                           | 12.0                              |
| L-carnitine<br>(mg)               | -                         | 20                                   | -                       | -                       | 20.0                       | 150                           | -                                 |

**Table S3.** Recommended adequate intake of vitamin K and estimated energy requirement in Japan.

| Population                    | Vitamin K<br>(µg/day) |        | Estimated Energy Requirement<br>(kcal/day) |        |
|-------------------------------|-----------------------|--------|--------------------------------------------|--------|
|                               | Male                  | Female | Male                                       | Female |
| 0–5-month-old infants         | 4                     | 4      | 950                                        | 900    |
| 6–11-month-old infants        | 7                     | 7      | 1300                                       | 1250   |
| 1–2-year-old children         | 50                    | 60     | 1550                                       | 1450   |
| 3–5-year-old children         | 60                    | 70     | 1850                                       | 1700   |
| 6–7-year-old children         | 80                    | 90     | 2250                                       | 2100   |
| 8–9-year-old children         | 90                    | 110    | 2600                                       | 2400   |
| 10–11-year-old children       | 110                   | 140    | 2800                                       | 2300   |
| 12–14-year-old children       | 140                   | 170    | 2650                                       | 2000   |
| 15–17-year-old boys and girls | 160                   | 150    | 2700                                       | 2050   |

|                              |     |     |      |      |
|------------------------------|-----|-----|------|------|
| 18–29-year-old men and women | 150 | 150 | 2600 | 1950 |
| 30–49-year-old men and women | 150 | 150 | 2400 | 1850 |
| 50–64-year-old men and women | 150 | 150 | 2100 | 1650 |
| 65–74-year-old men and women | 150 | 150 | 950  | 900  |
| >75-year-old men and women   | 150 | 150 | 1300 | 1250 |

|                                                       |      |           |         |           |          |
|-------------------------------------------------------|------|-----------|---------|-----------|----------|
|                                                       |      |           |         |           | IQ (DQ)  |
|                                                       |      |           |         |           | 80       |
| 21                                                    | 22   | 23        | 24      | 25        | 70       |
| 20                                                    | 13   | 14        | 15      | 16        |          |
| 19                                                    | 12   | 7         | 8       | 9         | 50       |
| 18                                                    | 11   | 6         | 3       | 4         | 35       |
| 17                                                    | 10   | 5         | 2       | 1         | 20       |
| Run                                                   | Walk | Inability | sitting | bedridden | 0        |
|                                                       |      |           |         |           | Mobility |
| SMID: severe motor and intellectual disabilities      |      |           |         |           |          |
| IQ: intelligence quotient, DQ: developmental quotient |      |           |         |           |          |

**Figure S1.** Ohshima's Classification for SMID.
